# Supplementary material
Source: PubMed Central journal article supplement (PMC9262823)
Supplement: NIHMS1807735-supplement-1.pdf [file NIHMS1807735-supplement-1.pdf]

1 Supporting Information

2  
3  
4  
5  
6  
7  
8  
9  
10  
11  
12  
13  
14  
15  
16  
17  
18  
19  
20  
21  
22  
23  
24  
25  
26  
27  
28  
29  
30  
31  
32  
33  
34

**Tuning Polymer Hydrophilicity to Regulate Gel Mechanics and Encapsulated Cell Morphology**

Renato S. Navarro <sup>†</sup>, Michelle S. Huang<sup>†</sup>, Julien G. Roth, Kelsea M. Hubka, Chris M. Long, Annika Enejder, Sarah C. Heilshorn\*

*<sup>†</sup> These authors contributed equally to this work.*

**Supporting Information**

|                |   |
|----------------|---|
| Table S1.....  | 2 |
| Figure S1..... | 3 |
| Figure S2..... | 3 |
| Figure S3..... | 4 |
| Figure S4..... | 5 |
| Figure S5..... | 6 |
| Figure S6..... | 7 |

1  
2  
3  
4  
5

| <b>hMSC</b>                |                                                       |                                                     |                                                                  |
|----------------------------|-------------------------------------------------------|-----------------------------------------------------|------------------------------------------------------------------|
| <b>Temperature Profile</b> | <b>Median Actin Area (<math>\mu\text{m}^2</math>)</b> | <b>Avg. Actin Area (<math>\mu\text{m}^2</math>)</b> | <b>Standard Deviation (<math>\mu\text{m}^2</math>, N = gels)</b> |
| I                          | 733.82                                                | 997.53                                              | 91.95                                                            |
| II                         | 635.66                                                | 803.08                                              | 52.29                                                            |
| III                        | 462.73                                                | 636.85                                              | 99.34                                                            |

  

| <b>HUVEC</b>               |                                                       |                                                     |                                                                  |
|----------------------------|-------------------------------------------------------|-----------------------------------------------------|------------------------------------------------------------------|
| <b>Temperature Profile</b> | <b>Median Actin Area (<math>\mu\text{m}^2</math>)</b> | <b>Avg. Actin Area (<math>\mu\text{m}^2</math>)</b> | <b>Standard Deviation (<math>\mu\text{m}^2</math>, N = gels)</b> |
| I                          | 271.09                                                | 525.52                                              | 33.06                                                            |
| II                         | 236.04                                                | 387.33                                              | 61.05                                                            |
| III                        | 243.05                                                | 361.90                                              | 74.56                                                            |

  

| <b>hNPC</b>                |                                                       |                                                     |                                                                  |
|----------------------------|-------------------------------------------------------|-----------------------------------------------------|------------------------------------------------------------------|
| <b>Temperature Profile</b> | <b>Median Actin Area (<math>\mu\text{m}^2</math>)</b> | <b>Avg. Actin Area (<math>\mu\text{m}^2</math>)</b> | <b>Standard Deviation (<math>\mu\text{m}^2</math>, N = gels)</b> |
| I                          | 52.11                                                 | 70.94                                               | 2.04                                                             |
| II                         | 54.43                                                 | 76.74                                               | 5.40                                                             |
| III                        | 57.90                                                 | 87.73                                               | 8.48                                                             |

6  
7  
8  
9  
10  
11  
12  
13  
14  
15  
16

**Supplemental Table S1.** Quantification and error measurements of actin area depicted in Figure 6. Standard deviation ( $N = \text{gels}$ ) represents the variance between gel replicates. For hMSCs,  $n = 1,063, 823,$  and  $899$  (**I**, **II**, and **III**) cells examined over  $N = 3$  independent gel samples. For HUVECs,  $n = 386, 448,$  and  $503$  (**I**, **II**, and **III**) cells examined over  $N = 3$  independent gel samples. For hNPCs,  $n = 3,357, 3,013,$  and  $3,067$  (**I**, **II**, and **III**) cells examined over  $N = 3$  independent gel samples.

1  
2  
3  
4  
5  
6  
7  
8  
9  
10  
11  
12  
13  
14  
15  
16  
17  
18  
19  
20  
21  
22

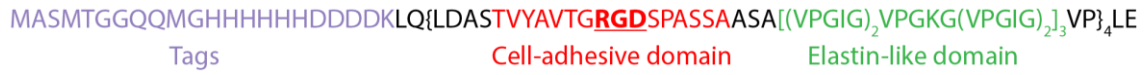

**Supplemental Figure S1.** Full amino acid sequence of cell-adhesive RGD-ELP with tag domains consisting of a T7 tag (MASMTGGQQMGG), a histidine tag (HHHHHH), and an enterokinase cleavage site (DDDDK) to permit tag removal if desired. All ELP proteins were kept intact with no tag removal for these studies.

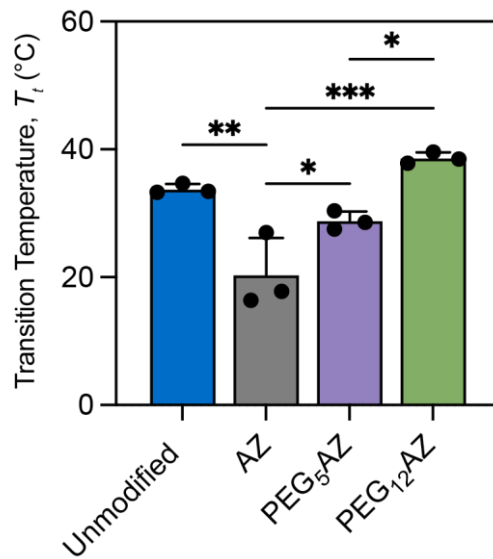

**Supplemental Figure S2.** Quantification of ELP transition temperatures before and after coupling reaction ( $n = 3$ , data are averages  $\pm$  standard deviation, \* $p < 0.1$ , \*\* $p < 0.01$ , \*\*\* $p < 0.001$ , one-way ANOVA with Tukey *post hoc* test).

1  
2  
3  
4  
5

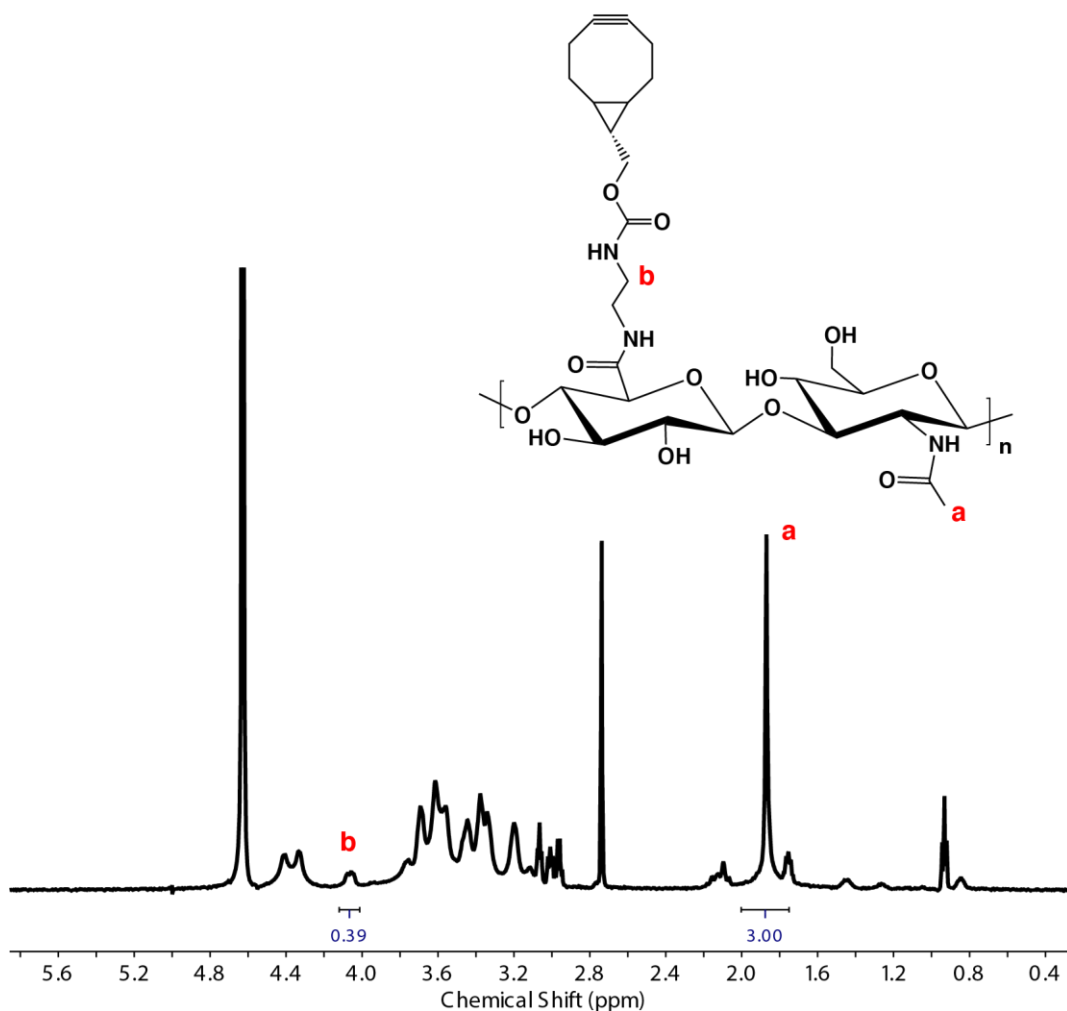

6  
7  
8  
9  
10  
11  
12  
13  
14  
15  
16

**Supplemental Figure S3.** <sup>1</sup>H NMR 600 MHz spectrum of hyaluronic acid conjugated with bicyclononyne.

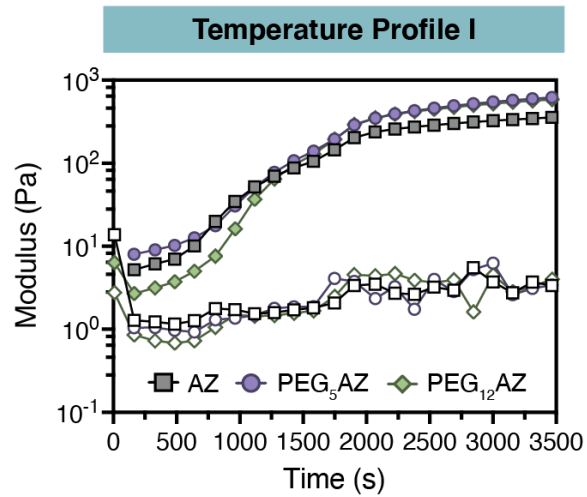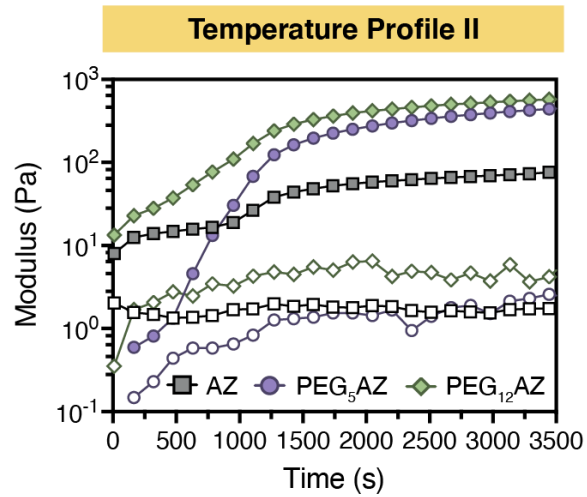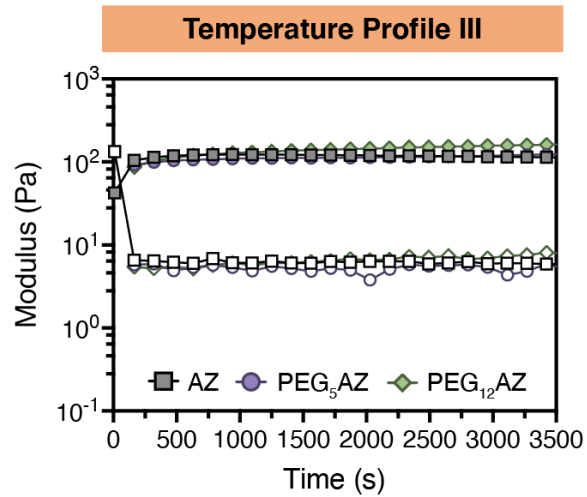

1  
 2 **Supplemental Figure S4.** Representative gelation time sweep data showing storage moduli  
 3 ( $G'$ , filled symbols) and loss moduli ( $G''$ , open symbols) during SPAAC-crosslinking of HELP-  
 4 SPAAC hydrogels for the three temperature profiles and each of the HELP-SPAAC gel  
 5 formulations.

1  
2  
3  
4  
5  
6

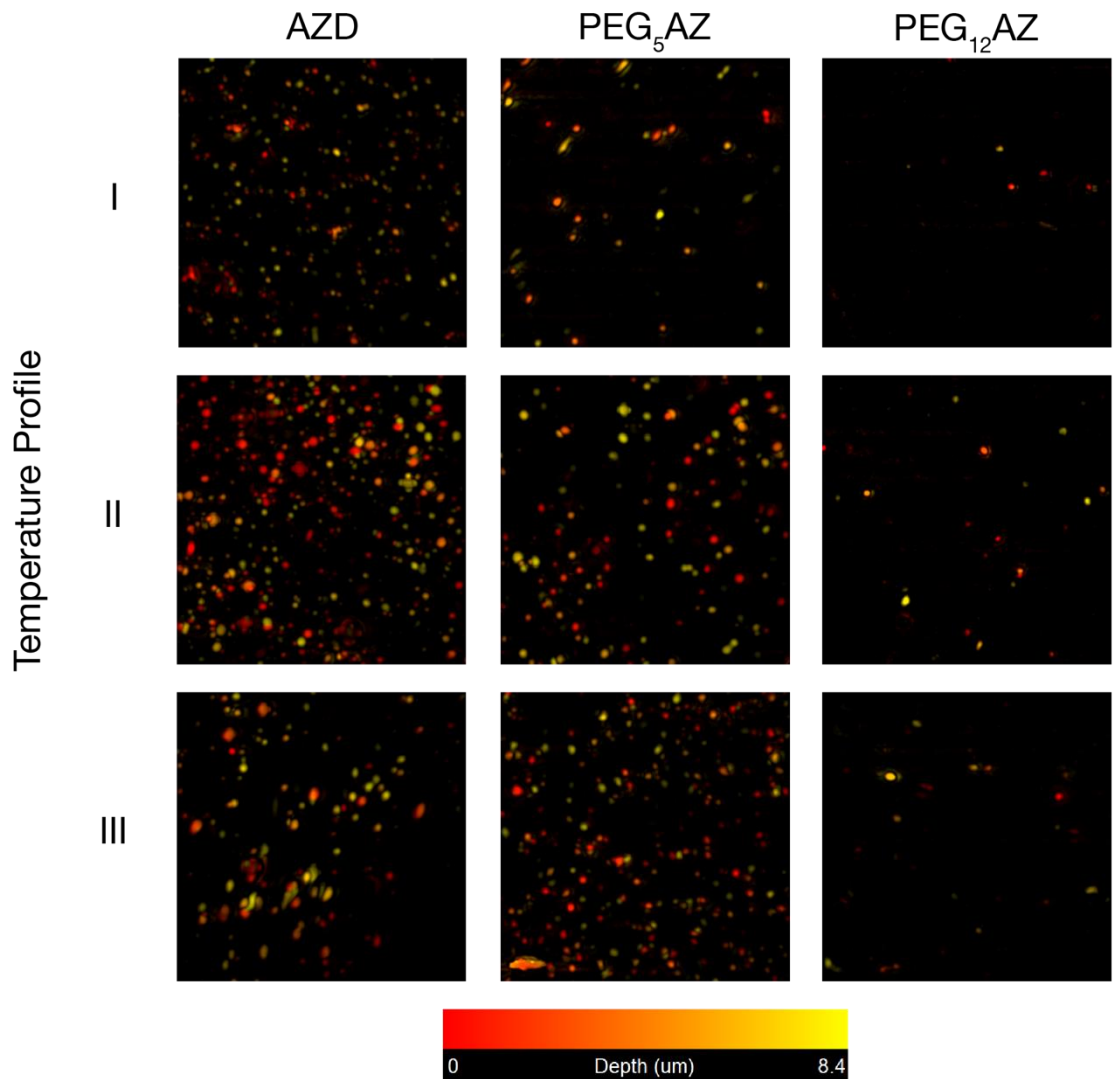

7  
8  
9  
10  
11  
12  
13  
14  
15

**Supplemental Figure S5.** Representative maximum projections of CARS images of HELP-SPAAC gels crosslinked with all three temperature profiles. Regions of bright intensity are protein-rich ELP aggregates.

1  
2  
3  
4  
5  
6

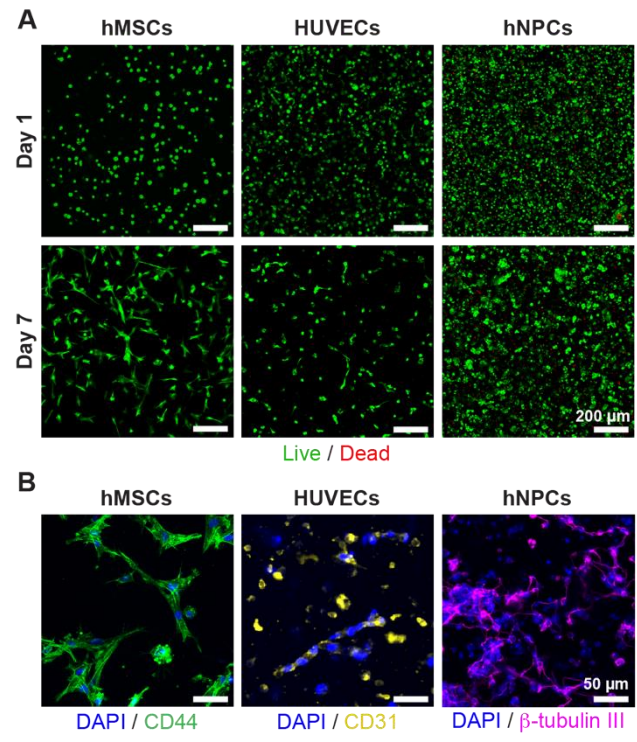

7  
8  
9  
10  
11  
12  
13  
14  
15  
16  
17  
18  
19  
20  
21  
22

**Supplemental Figure S6.** HELP-SPAAC hydrogels support 3D cell culture. A) Live/Dead staining of hMSCs, HUVECs, and hNPCs cultured within HELP-SPAAC hydrogels (formulated with PEG<sub>5</sub>AZ and temperature profile I) indicated high viability for all cell types 1 and 7 days post-encapsulation. B) Representative confocal images of immunostained hMSCs, HUVECs, and hNPCs cultured within HELP-SPAAC hydrogels (formulated with PEG<sub>5</sub>AZ and temperature profile I). After 7 days in culture, hMSCs stain positive for the MSC surface marker CD44 (green), HUVECs stain positive for the endothelial marker CD31 (yellow), and hNPCs stain positive for the neuronal marker β-tubulin III (pink). Nuclei are counter-stained with DAPI (blue).
